# Supplementary material for: Consumption of Ultra-Processed Food and Its Association with Sociodemographic Characteristics and Diet Quality in a Representative Sample of French Adults
Source: Nutrients. 2021 Feb 20;13(2):682. doi: 10.3390/nu13020682 (PMC7924346; doi:10.3390/nu13020682)
Supplement: Supplementary file 1 [file nutrients-13-00682-s001.pdf]

## Supplementary Material

**Table S1.** Mean daily grams intake according to NOVA food groups. French population aged  $\geq 18$  years. ENNS 2006 ( $n = 2642$ ).

| NOVA Food Groups                                                  | Grams  | CI (95%) |        | % of Total Grams | CI (95%) |      |
|-------------------------------------------------------------------|--------|----------|--------|------------------|----------|------|
| Unprocessed or minimally processed foods and culinary ingredients | 1146.1 | 1121.8   | 1170.4 | 59.9             | 59       | 60.7 |
| Meat (beef, poultry, pork, and others)                            | 99.4   | 95.1     | 103.8  | 5.4              | 5.2      | 5.6  |
| Added fat <sup>1</sup>                                            | 16.9   | 16.1     | 17.7   | 0.9              | 0.9      | 1    |
| Fruits                                                            | 168.7  | 160      | 177.4  | 8.6              | 8.2      | 9    |
| Pâtisseries <sup>2</sup>                                          | 34.4   | 31.3     | 37.4   | 1.8              | 1.7      | 1.9  |
| Pasta                                                             | 50.5   | 47.2     | 53.9   | 2.8              | 2.6      | 3    |
| Milk and yogurt                                                   | 122.2  | 114.5    | 130    | 6.5              | 6.1      | 6.9  |
| Potatoes and other tubers                                         | 49.6   | 46.6     | 52.7   | 2.6              | 2.4      | 2.8  |
| Cereals                                                           | 30.7   | 28       | 33.4   | 1.7              | 1.5      | 1.9  |
| Table sugar                                                       | 10.4   | 9.7      | 11.1   | 0.5              | 0.5      | 0.6  |
| Vegetables                                                        | 157.6  | 150.4    | 164.9  | 8.2              | 7.9      | 8.6  |
| Mixed dishes                                                      | 28.3   | 25.9     | 30.6   | 1.5              | 1.4      | 1.7  |
| Fish and seafood                                                  | 18.7   | 15.8     | 21.5   | 1.1              | 0.9      | 1.3  |
| Eggs                                                              | 11.8   | 10.6     | 12.9   | 0.6              | 0.6      | 0.7  |
| Home-made sauces                                                  | 2.6    | 2.2      | 3      | 0.1              | 0.1      | 0.2  |
| Nuts                                                              | 3.8    | 3.4      | 4.2    | 0.2              | 0.2      | 0.2  |
| Legumes                                                           | 24.7   | 22.6     | 26.7   | 1.4              | 1.2      | 1.5  |
| Natural fruits juices                                             | 17.8   | 15       | 20.6   | 0.9              | 0.8      | 1.1  |
| Coffee and tea                                                    | 294.2  | 279.7    | 308.8  | 14.6             | 14       | 15.3 |
| Spices                                                            | 3.2    | 1.8      | 4.6    | 0.2              | 0.1      | 0.2  |
| Processed foods                                                   | 317.4  | 301.6    | 333.2  | 16               | 15.4     | 16.6 |
| Bread                                                             | 103.6  | 99.6     | 107.7  | 5.5              | 5.3      | 5.7  |
| Cheese                                                            | 46.8   | 44.5     | 49.2   | 2.5              | 2.4      | 2.6  |
| Meat products                                                     | 122.1  | 107.6    | 136.5  | 5.6              | 5.1      | 6.2  |
| Processed fruits                                                  | 9.9    | 9        | 10.8   | 0.5              | 0.5      | 0.6  |
| Canned vegetables and legumes                                     | 20.4   | 18       | 22.8   | 1.1              | 1        | 1.2  |
| Beer and wine                                                     | 14.6   | 13.2     | 15.9   | 0.8              | 0.7      | 0.9  |

|                                                                      |        |        |        |      |      |     |
|----------------------------------------------------------------------|--------|--------|--------|------|------|-----|
| Ultra-processed foods                                                | 451.4  | 433    | 469.7  | 24.1 | 23.3 | 25  |
| Ready-to-eat meals <sup>3</sup>                                      | 124.8  | 118.3  | 131.3  | 6.7  | 6.4  | 7.1 |
| Confectionery <sup>4</sup>                                           | 48.2   | 45.3   | 51.1   | 2.6  | 2.5  | 2.8 |
| Cold cuts (charcuterie) and other ultra-processed meats <sup>5</sup> | 39.3   | 37.2   | 41.4   | 2.2  | 2    | 2.3 |
| Bakery products <sup>6</sup>                                         | 16.4   | 14.7   | 18.2   | 0.9  | 0.8  | 1   |
| Sweetened beverages <sup>7</sup>                                     | 127.6  | 113.2  | 141.9  | 6.5  | 5.9  | 7.2 |
| Dairy products                                                       | 45.9   | 42.4   | 49.5   | 2.5  | 2.3  | 2.7 |
| Cookies <sup>8</sup>                                                 | 8.1    | 7.1    | 9.1    | 0.4  | 0.4  | 0.5 |
| Bread                                                                | 9.6    | 8.4    | 10.8   | 0.6  | 0.5  | 0.6 |
| Sauces                                                               | 9.9    | 9.1    | 10.7   | 0.5  | 0.5  | 0.6 |
| Distilled alcoholic drinks                                           | 10.3   | 7.6    | 13.1   | 0.5  | 0.4  | 0.6 |
| Margarine                                                            | 2.4    | 2.1    | 2.7    | 0.1  | 0.1  | 0.1 |
| Breakfast cereals                                                    | 3.5    | 2.8    | 4.1    | 0.2  | 0.2  | 0.2 |
| Chips and crackers                                                   | 1.4    | 1.1    | 1.7    | 0.1  | 0.1  | 0.1 |
| Cheese <sup>9</sup>                                                  | 3.6    | 3      | 4.1    | 0.2  | 0.2  | 0.2 |
| TOTAL                                                                | 1914.9 | 1881.9 | 1947.8 | 100  |      |     |

1: Added fat: includes table fat from animal or vegetable (such as oil, olive, and butter). 2: Patisseries: include homemade sweets and desserts. 3: Ready-to-eat meals: include fast-food, noodles, canned or dehydrated soups, pizza, frozen dishes, sandwiches, and other ready-to-eat meals. 4: Confectionery: includes sweets (such as chocolate bars, bonbons, gums, lollypop, candy, gummies, ice-cream, torrone, etc.). 5: Cold cuts and other ultra-processed meat: include nuggets, sausages, hamburgers, different types of cold cuts/charcuterie (ham, mortadella, and turkey blanquet), and pre-seasoned meat. 6: Bakery products: include sweet baked products such as cakes, pies, and sweet breads. 7: Sweetened beverages: include soft drinks, artificial juices, and other sweetened beverages; 8: Cookies: include every type of ultra-processed cookie. 9: Ultra-processed cheese: includes cream-chesse, petit suisse and cheese with sweeteners.

**Table S2.** Nutrient intake indicators of the overall population and according quintiles of ultra-processed food consumption. French population aged  $\geq 18$  years old. ENNS 2006 ( $n = 2642$ ).

| Nutritional Indicators <sup>a</sup> | Overall Population |      | Quintiles of Ultra-Processed Foods Consumption<br>(% of Total Grams Intake) <sup>b</sup> |                 |                 |                 |                              | Regression Coefficient |                                           |       |
|-------------------------------------|--------------------|------|------------------------------------------------------------------------------------------|-----------------|-----------------|-----------------|------------------------------|------------------------|-------------------------------------------|-------|
|                                     | Mean               | SD   | 1st<br>Quintile<br>(Lowest)                                                              | 2nd<br>Quintile | 3rd<br>Quintile | 4th<br>Quintile | 5th<br>Quintile<br>(Highest) | Adjusted <sup>c</sup>  | Adjusted and<br>Standardized <sup>c</sup> | $p^*$ |
| Total energy (kcal)                 | 2110.7             | 18.7 | 2025.6                                                                                   | 2128.0          | 2119.9          | 2109.3          | 2171.0                       | 27.06                  | 0.06                                      | 0.015 |
| Energy density (kcal/g)             | 1.5                | 0.0  | 1.4                                                                                      | 1.5             | 1.5             | 1.5             | 1.6                          | 0.05                   | 0.19                                      | 0.000 |
| Protein (% of total energy)         | 17.5               | 0.1  | 18.2                                                                                     | 18.0            | 17.2            | 17.4            | 16.5                         | −0.41                  | −0.16                                     | 0.000 |
| Carbohydrates (% of total energy)   | 41.4               | 0.2  | 40.6                                                                                     | 39.8            | 41.9            | 42.1            | 42.6                         | 0.65                   | 0.13                                      | 0.000 |
| Free sugar (% of total energy)      | 11.7               | 0.2  | 9.2                                                                                      | 10.2            | 11.6            | 12.4            | 15.3                         | 1.40                   | 0.35                                      | 0.000 |
| Total fat (% of total energy)       | 37.6               | 0.2  | 36.9                                                                                     | 37.8            | 37.1            | 37.8            | 38.5                         | 0.31                   | 0.08                                      | 0.008 |
| Saturated fat (% of total energy)   | 15.7               | 0.1  | 15.3                                                                                     | 15.6            | 15.6            | 16.2            | 15.9                         | 0.18                   | 0.07                                      | 0.012 |
| Fiber density (g/1000 kcal)         | 8.9                | 0.1  | 9.4                                                                                      | 9.0             | 9.0             | 8.6             | 8.1                          | −0.29                  | −0.13                                     | 0.000 |
| Potassium (mg/1000kcal)             | 1491.8             | 9.5  | 1557.4                                                                                   | 1503.9          | 1502.0          | 1475.8          | 1419.5                       | −29.70                 | −0.11                                     | 0.000 |
| Sodium density (g/1.000 kcal)       | 1485.3             | 9.2  | 1487.6                                                                                   | 1485.6          | 1500.8          | 1493.0          | 1459.2                       | −3.97                  | 0.02                                      | 0.539 |

a: All values refer to means; b: Average of UPF: 1st quintile ( $n$  624): 8.2% UPF (min: 0.2%/max: 12.3%); 2nd quintile ( $n$  588): 15.4% UPF (min: 12.3%/max: 18.3%); 3rd quintile ( $n$  548): 21.3% UPF (min: 18.3%/max: 24.7%); 4th quintile ( $n$  510): 29.0% UPF (min: 24.7%/max: 34.6%); 5th quintile ( $n$  372): 45.1% UPF (min: 34.6%/max: 85.5%). c: Adjusted for total energy intake and sociodemographic characteristics (age, sex, area, region, occupation and education level); \* Tests of linear trend were performed by treating quintiles of the dietary share of ultra-processed food as an ordinal variable; SD, standard deviation.

**Table S3.** Prevalence of inadequate nutrient intake across overall population and according quintiles of ultra-processed food consumption. French population aged  $\geq 18$  years old. ENNS 2006 ( $n = 2642$ ).

| Quintiles of Ultra-Processed Foods Consumption (% of Total Grams Intake) <sup>a</sup> | Energy                                              |                   |                                           |                   |                                           |                   | Saturated Fat > 12% of Total Energy Intake <sup>c</sup> |                   | Free Sugar > 100 g/day <sup>c</sup> |                   | Fiber $\leq 30$ g/day <sup>c</sup> |                   | Potassium Density < 1755 mg/1000 kcal <sup>d</sup> |                   | Sodium Density > 1 g/1000 kcal <sup>d</sup> |                 |
|---------------------------------------------------------------------------------------|-----------------------------------------------------|-------------------|-------------------------------------------|-------------------|-------------------------------------------|-------------------|---------------------------------------------------------|-------------------|-------------------------------------|-------------------|------------------------------------|-------------------|----------------------------------------------------|-------------------|---------------------------------------------|-----------------|
|                                                                                       | Density < 1.25 kcal/g or > 1.45 kcal/g <sup>b</sup> |                   | Energy Density < 1.25 kcal/g <sup>b</sup> |                   | Energy Density > 1.45 kcal/g <sup>b</sup> |                   |                                                         |                   |                                     |                   |                                    |                   |                                                    |                   |                                             |                 |
|                                                                                       | %                                                   | PR <sup>e</sup>   | %                                         | PR <sup>e</sup>   | %                                         | PR <sup>e</sup>   | %                                                       | PR <sup>e</sup>   | %                                   | PR <sup>e</sup>   | %                                  | PR <sup>e</sup>   | %                                                  | PR <sup>e</sup>   | %                                           | PR <sup>e</sup> |
| 1st quintile (lowest)                                                                 | 73.4                                                | 1.0               | 42.1                                      | 1.0               | 31.3                                      | 1.0               | 80.4                                                    | 1.0               | 2.9                                 | 1.0               | 90.5                               | 1.0               | 65.4                                               | 1.0               | 95.7                                        | 1.0             |
| 2nd quintile                                                                          | 70.4                                                | 0.9               | 33.2                                      | 0.9               | 37.2                                      | 1.1               | 86.4                                                    | 1.4               | 6.1                                 | 1.9               | 92.2                               | 1.9*              | 75.2                                               | 1.2               | 96.4                                        | 1.3             |
| 3rd quintile                                                                          | 74.5                                                | 0.9               | 29.6                                      | 0.7*              | 44.9                                      | 1.3               | 87.0                                                    | 1.3               | 8.2                                 | 1.7               | 92.3                               | 1.3               | 75.5                                               | 1.3               | 95.6                                        | 0.9             |
| 4th quintile                                                                          | 79.8                                                | 1.2               | 22.2                                      | 0.6*              | 57.6                                      | 1.7*              | 90.4                                                    | 2.2*              | 13.7                                | 3.5*              | 96.5                               | 3.0*              | 83.9                                               | 1.8*              | 93.7                                        | 0.8             |
| 5th quintile (highest)                                                                | 87.6                                                | 1.9* <sup>†</sup> | 11.3                                      | 0.4* <sup>†</sup> | 76.3                                      | 2.8* <sup>†</sup> | 89.5                                                    | 2.2* <sup>†</sup> | 26.9                                | 5.8* <sup>†</sup> | 97.8                               | 3.7* <sup>†</sup> | 88.4                                               | 2.5* <sup>†</sup> | 90.6                                        | 0.7             |
| Total                                                                                 | 76.2                                                | -                 | 29.3                                      | -                 | 46.9                                      | -                 | 86.3                                                    | -                 | 10.2                                | -                 | 93.5                               | -                 | 76.5                                               | -                 | 94.7                                        | -               |

a: Average of UPF: 1st quintile ( $n = 624$ ): 8.2% UPF (min: 0.2%/max: 12.3%); 2nd quintile ( $n = 588$ ): 15.4% UFP (min: 12.3%/max: 18.3%); 3rd quintile ( $n = 548$ ): 21.3% UPF (min: 18.3%/max: 24.7%); 4th quintile ( $n = 510$ ): 29.0% UPF (min: 24.7%/max: 34.6%); 5th quintile ( $n = 372$ ): 45.1% UPF (min: 34.6%/max: 85.5%). b: World Cancer Research Foundation (WCRF). Energy density: finding the balance for cancer prevention. London: World Cancer Research Fund; 2009. c: Agence nationale de sécurité sanitaire de l'alimentation, de l'environnement et du travail (ANSES). Actualisation des repères du PNNS: élaboration des références nutritionnelles. ANSES, 2016. d: World Health Organization (WHO), World Health Organization issues new guidance on dietary salt and potassium, Geneva; 2013. e: PR (Prevalence Ratio) were adjusted for total energy intake and sociodemographic characteristics (age, sex, area, region, occupation and education level); \* Statistically significant  $p < 0.05$ ; <sup>†</sup> Tests of linear trend were performed by treating quintiles of the dietary share of ultra-processed food as an ordinal variable ( $p < 0.05$ ).
